# Supplementary material for: Space and Vine Cultivar Interact to Determine the Arbuscular Mycorrhizal Fungal Community Composition
Source: MDPI journal article supplement (doi:10.3390/jof6040317), 2020-11-27

**Supplementary Figure 1.** Maximum Likelihood phylogenetic tree obtained with IQTREE (Nguyen et al., 2015) from a combined MAFFT (Kato & Standley, 2013) alignment of the virtual taxa (VTX codes) found in the present study and available representative arbuscular mycorrhizal fungi sequences from GenBank (accession codes provided after species names). Bootstrap support values  $\geq 90$  are shown. The sequence of the saprotrophic fungus *Mortierella polycephala* has been used to root the tree.

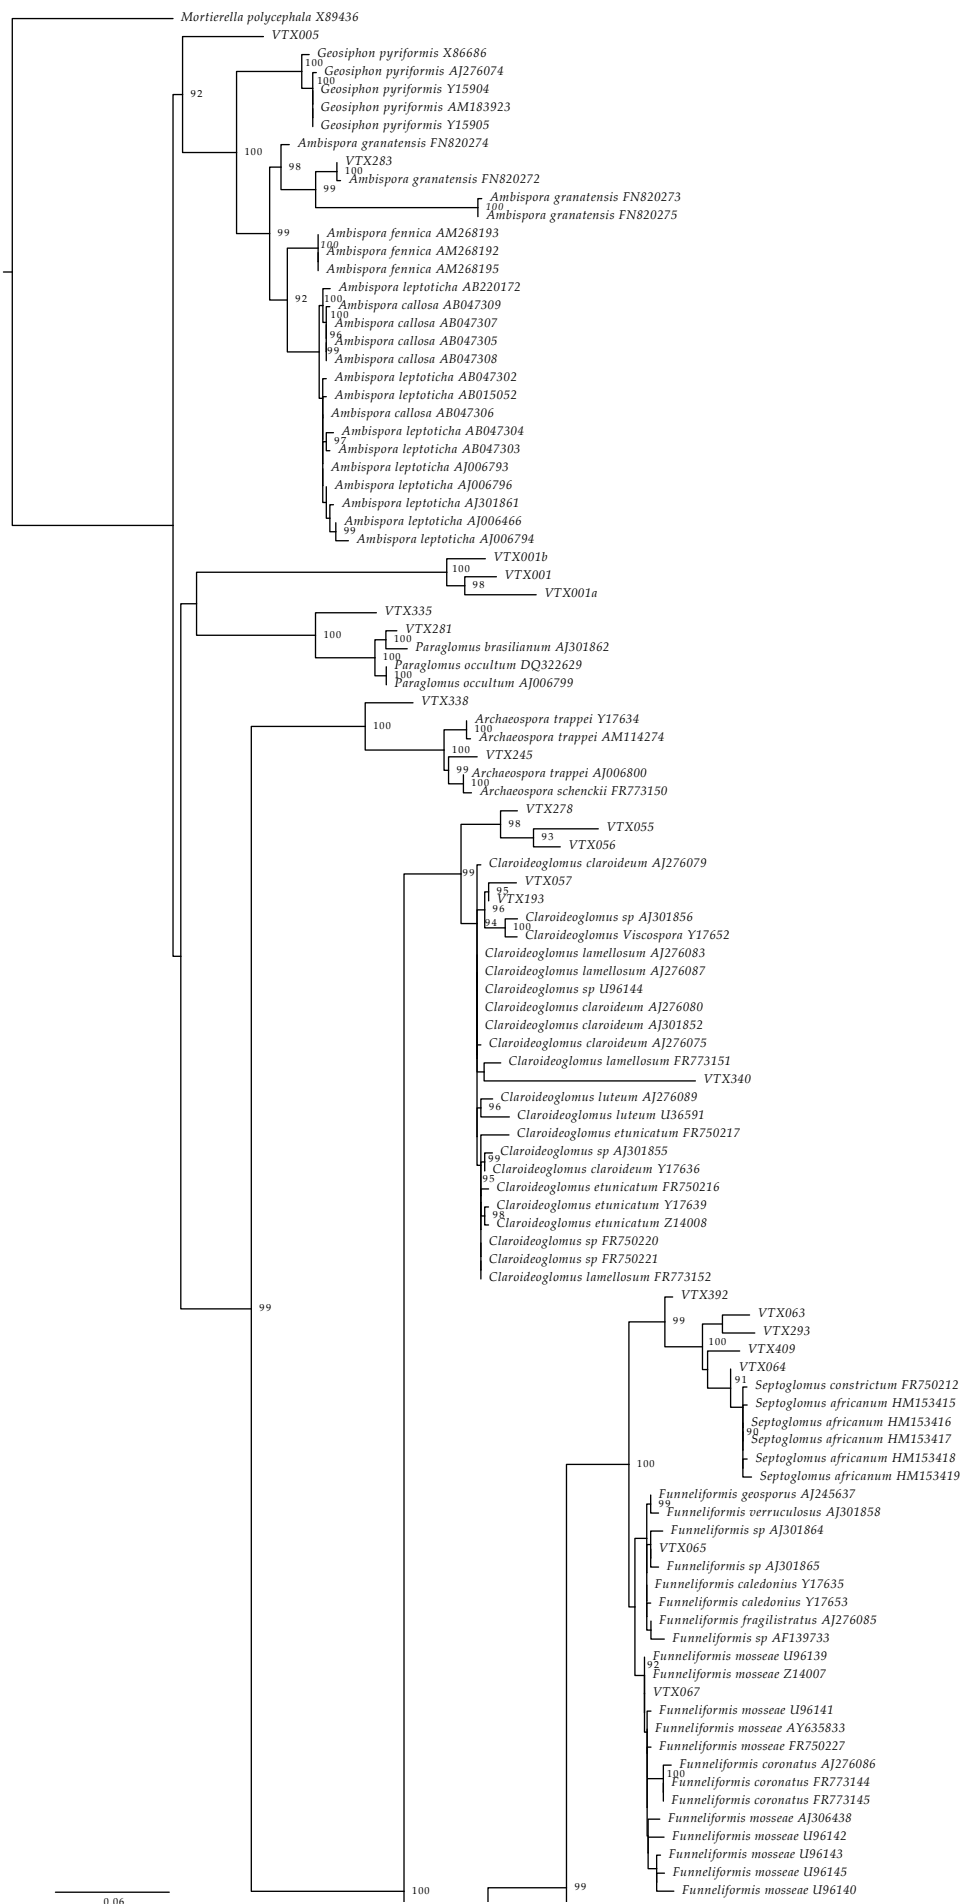

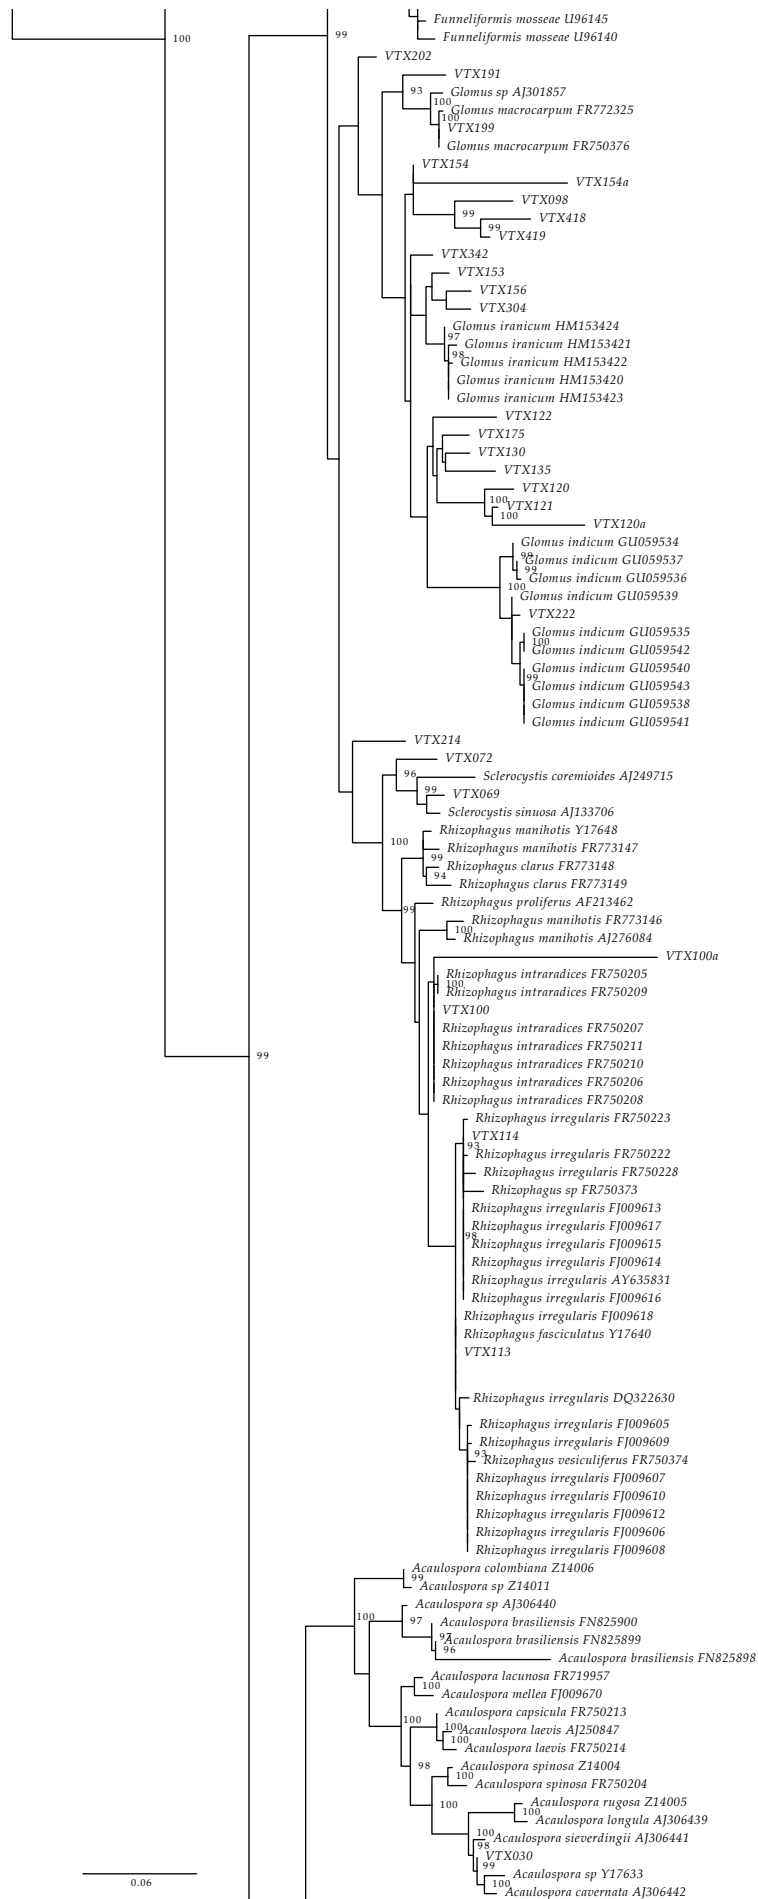

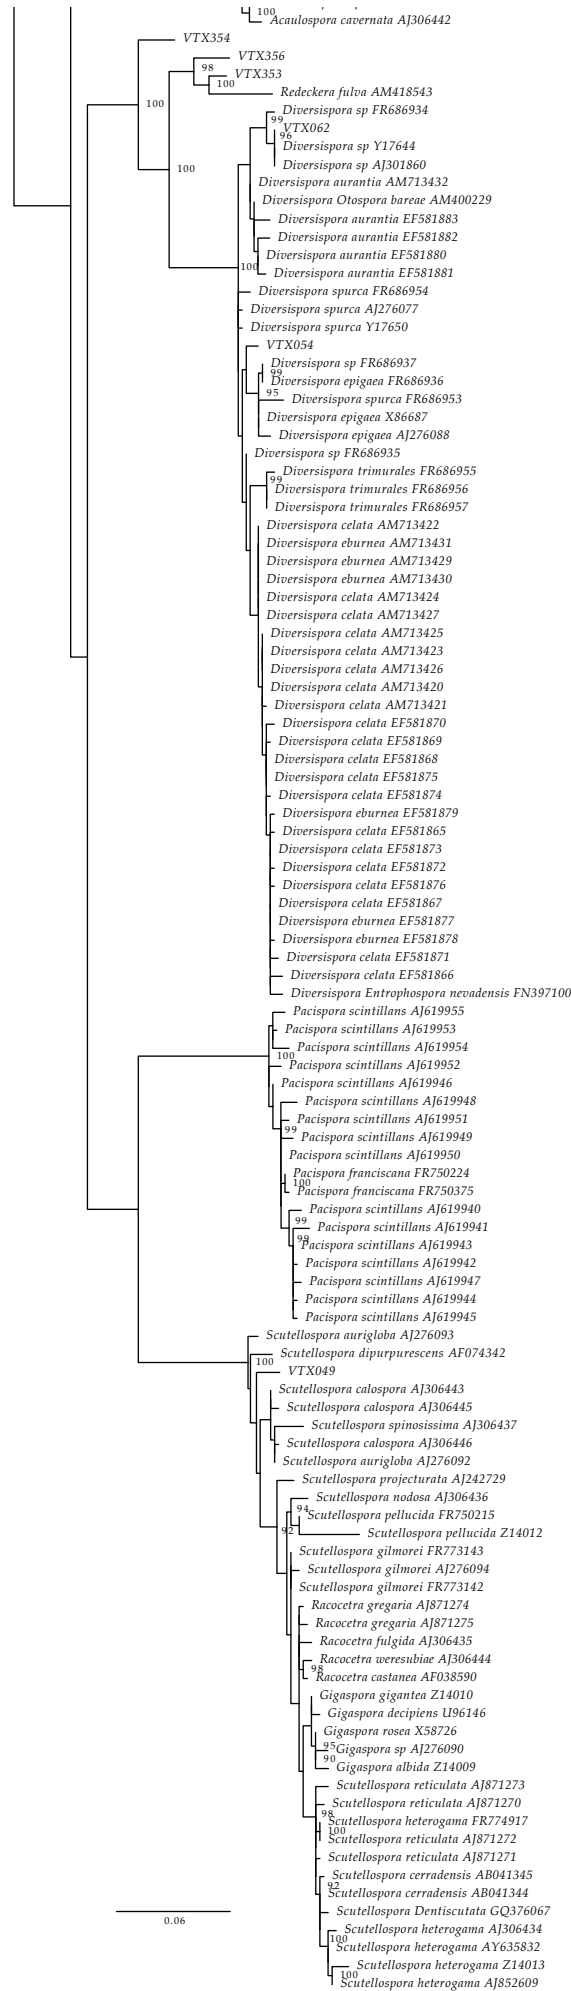

Supplement: s1 [file s1]
